# Supplementary material
Source: MDPI journal article supplement (https://www.mdpi.com/1424-8247/17/2/237)
Supplement: s1 [file s1]

## 90-minute Baseline Absolute Power

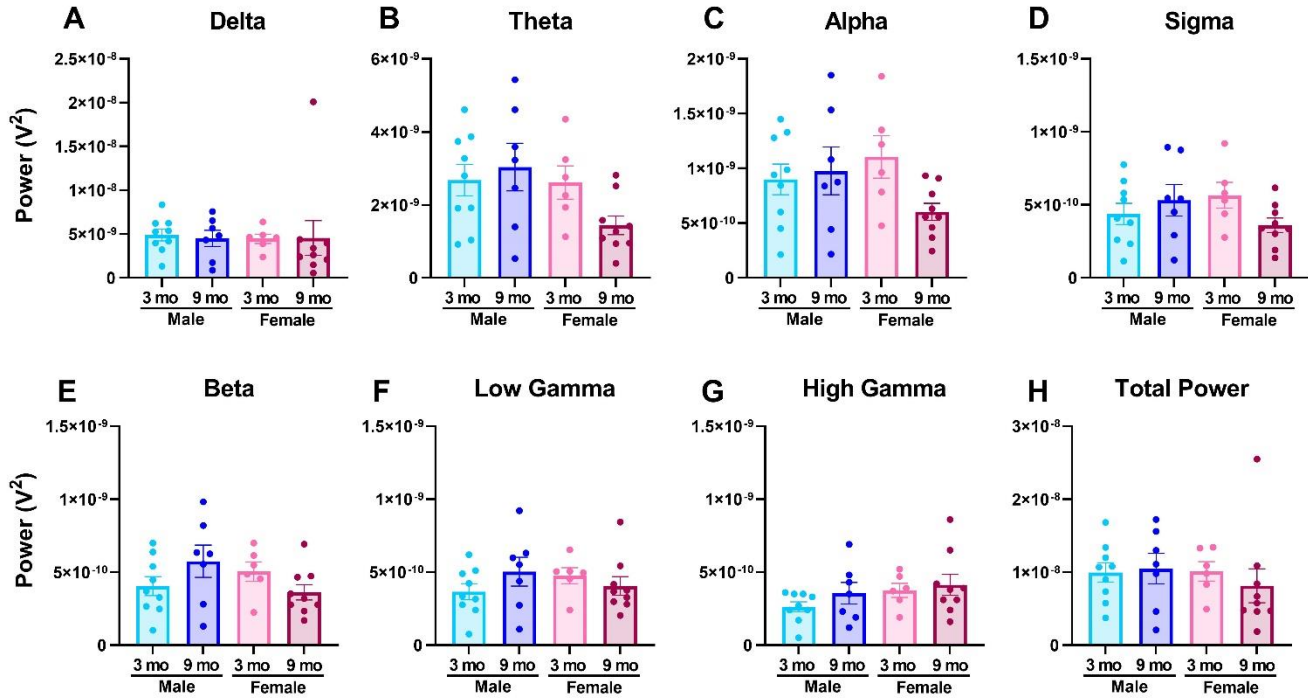

**Figure S1. There were no group differences in absolute power during the baseline period.** qEEG data are shown as a group mean  $\pm$ SEM of absolute (A-G) or total (H) power during the 90 minute baseline period on each individuals' respective vehicle day. Data are summed across the delta [0.5–4 Hz] (A), theta [4–8 Hz] (B), alpha [8–12 Hz] (C), sigma [12–16 Hz] (D), beta [16–24 Hz] (E), low gamma [30–50 Hz] (F), high gamma [50–100 Hz] (G) frequency bands and summed total power [0.5–100 Hz] (H) to compare 3-month-old male (n=9) and female (n=6) and 9-month-old male (n=7) and female (n=9) rats; circles represent individual datapoints.

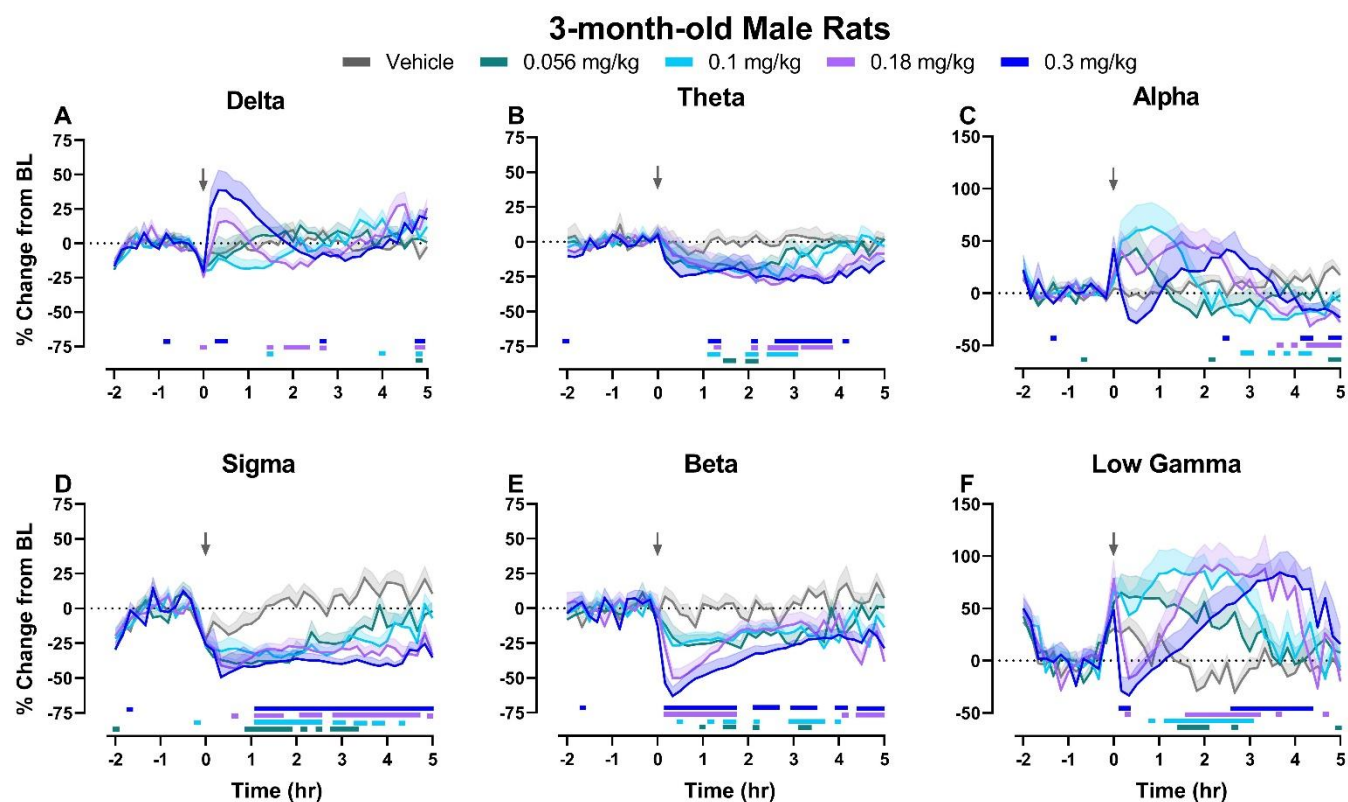

**Figure S2. MK-801 significantly affects all spectral power bands in 3-month-old male rats.** Time course effects of MK-801 are displayed as group means  $\pm$ SEM ( $n=8-9$ ) as the percent change from 90-min baseline in 10-minute bins across the 7-hour recording period on delta (A) theta (B) alpha (C) sigma (D), beta (E), and low gamma (F) in 3-month-old male rats. MK-801 was administered at time point 0, represented by an arrow. On the x-axis, -2 corresponds to ZT 0 and 5 corresponds to ZT 7. Horizontal colored lines matching the respective dose color represent the 10-minute bins at which MK-801-treated groups were significantly different from vehicle-treated groups.

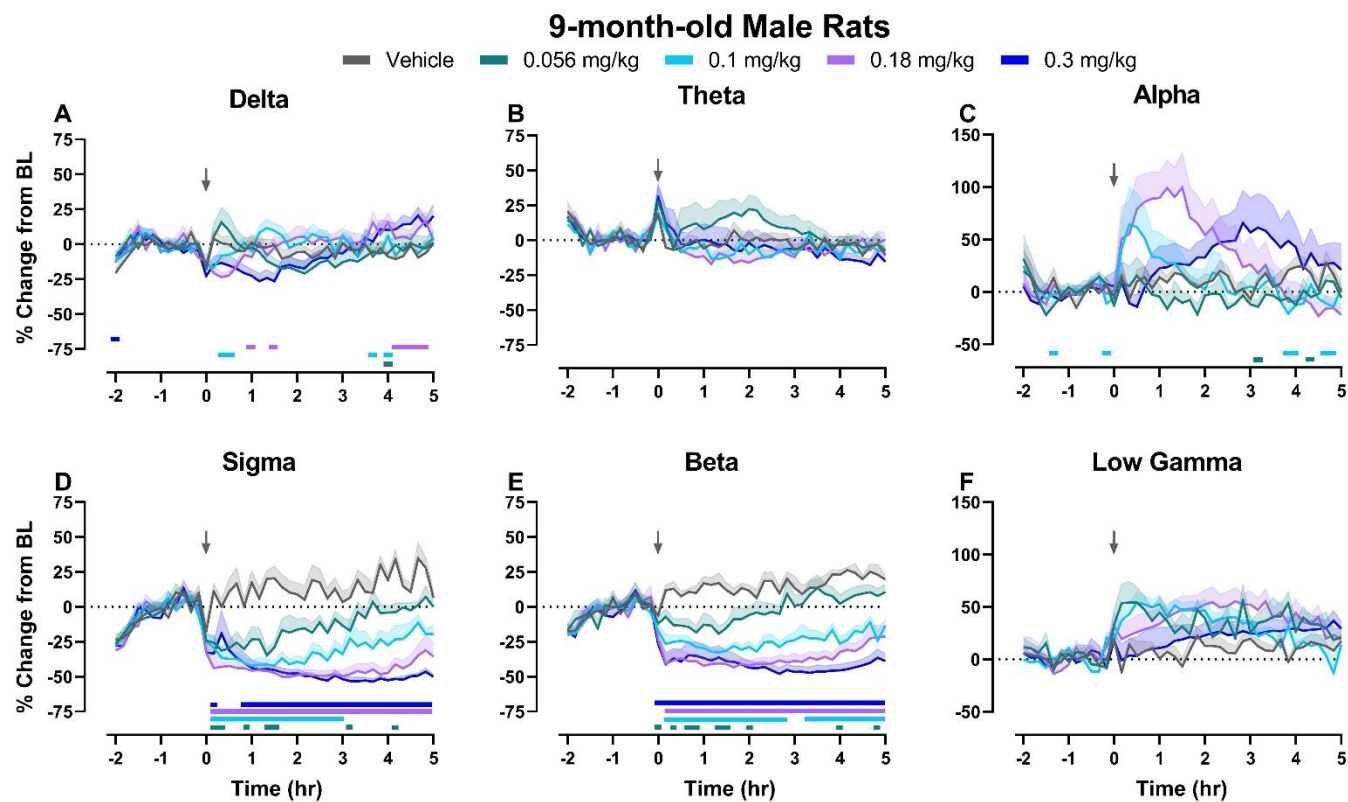

**Figure S3. MK-801 differentially affects spectral power bands in 9-month-old male rats.** Time course effects of MK-801 are displayed as group means  $\pm$  SEM ( $n=7-8$ ) as the percent change from 90-min baseline in 10-minute bins across the 7-hour recording period on delta (A) theta (B) alpha (C) sigma (D), beta (E), and low gamma (F) in 9-month-old male rats. MK-801 was administered at time point 0, represented by an arrow. On the x-axis, -2 corresponds to ZT 0 and 5 corresponds to ZT 7. Horizontal colored lines matching the respective dose color represent the 10-minute bins at which MK-801-treated groups were significantly different from vehicle-treated groups.

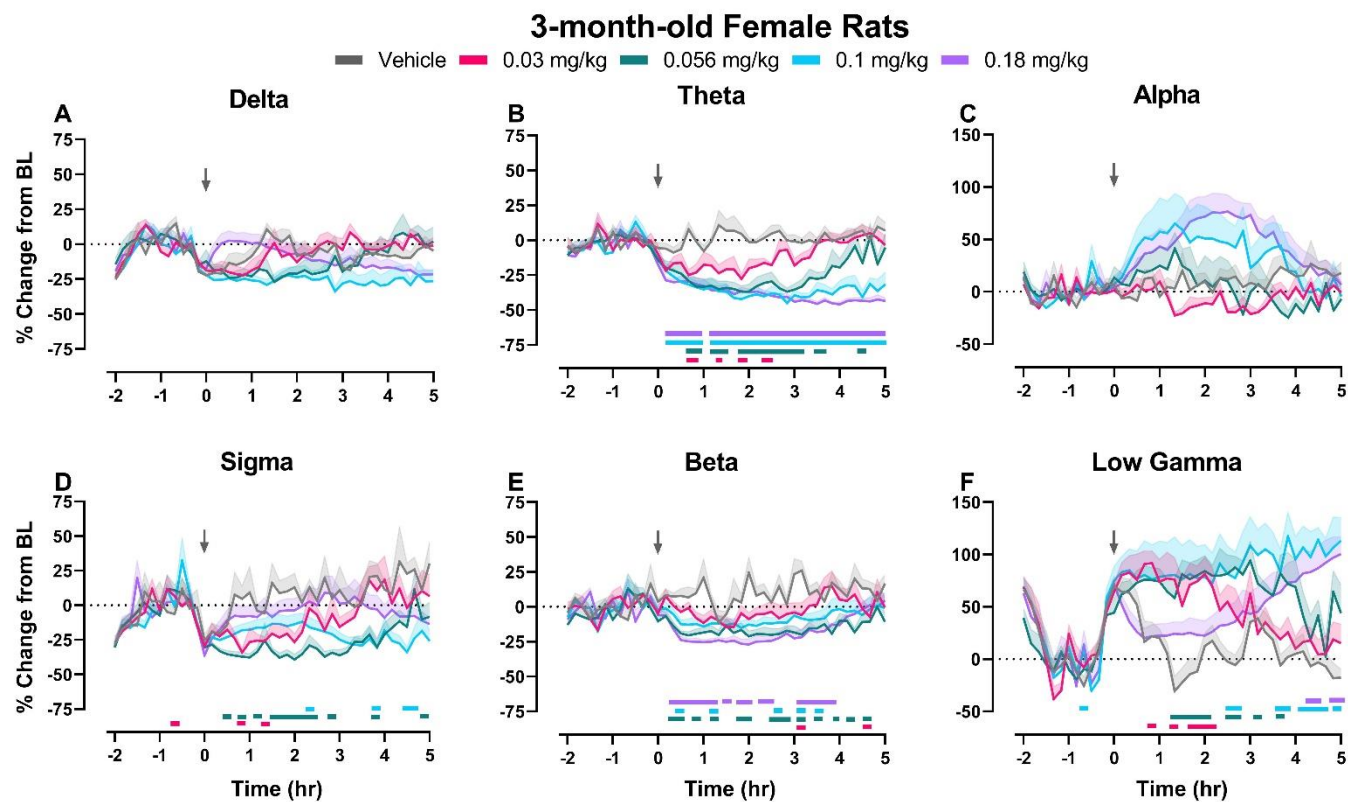

**Figure S4. MK-801 differentially affects spectral power bands in 3-month-old female rats.** Time course effects of MK-801 are displayed as group means  $\pm$ SEM ( $n=6$ ) as the percent change from 90-min baseline in 10-minute bins across the 7-hour recording period on delta (A) theta (B) alpha (C) sigma (D), beta (E), and low gamma (F) in 3-month-old female rats. MK-801 was administered at time point 0, represented by an arrow. On the x-axis, -2 corresponds to ZT 0 and 5 corresponds to ZT 7. Horizontal colored lines matching the respective dose color represent the 10-minute bins at which MK-801-treated groups were significantly different from vehicle-treated groups.

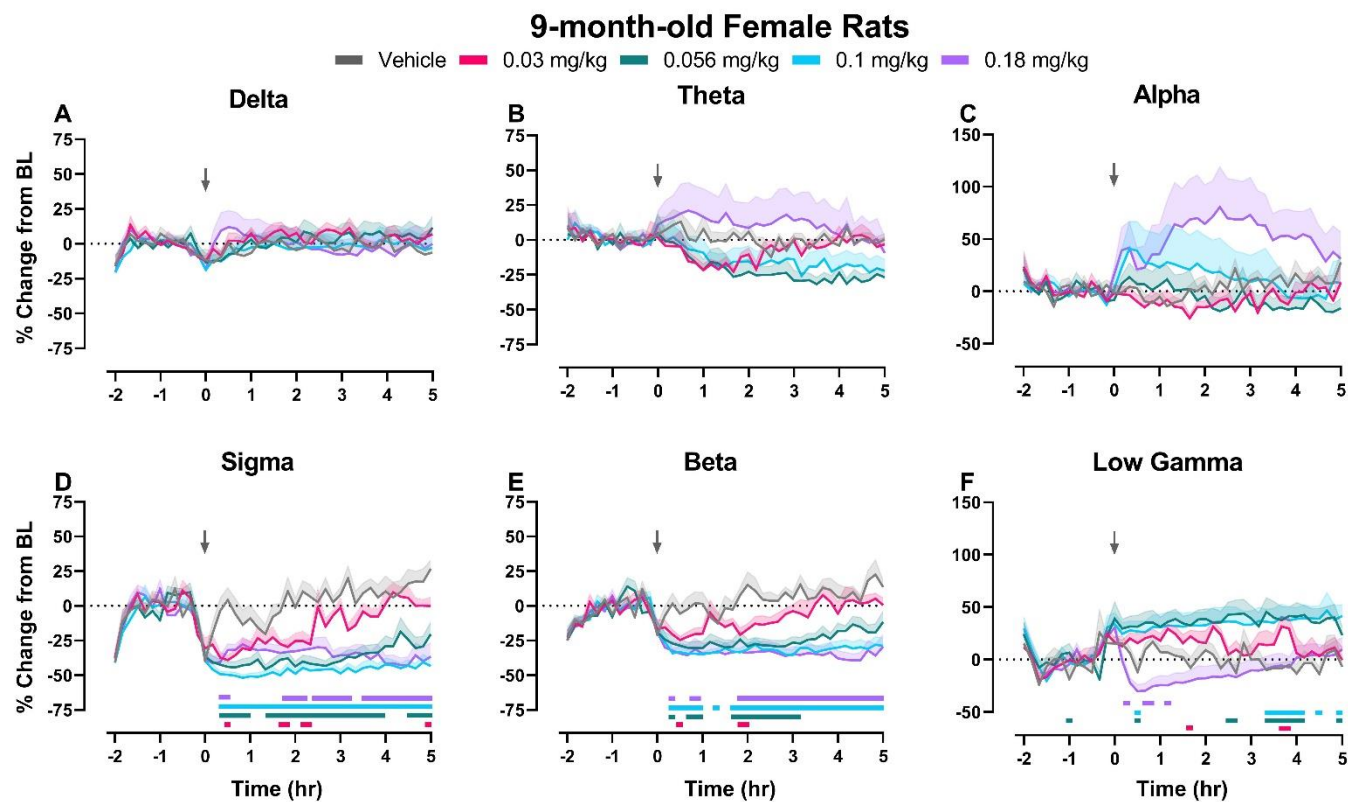

**Figure S5. MK-801 affects spectral power bands in the 12-50 (sigma, beta, low gamma) Hz range in 9-month-old female rats.** Time course effects of MK-801 are displayed as group means  $\pm$ SEM ( $n=9$ ) as the percent change from 90-min baseline in 10-minute bins across the 7-hour recording period on delta (A) theta (B) alpha (C) sigma (D), beta (E), and low gamma (F) in 9-month-old female rats. MK-801 was administered at time point 0, represented by an arrow. On the x-axis, -2 corresponds to ZT 0 and 5 corresponds to ZT 7. Horizontal colored lines matching the respective dose color represent the 10-minute bins at which MK-801-treated groups were significantly different from vehicle-treated groups.

### 30-90 minute Average

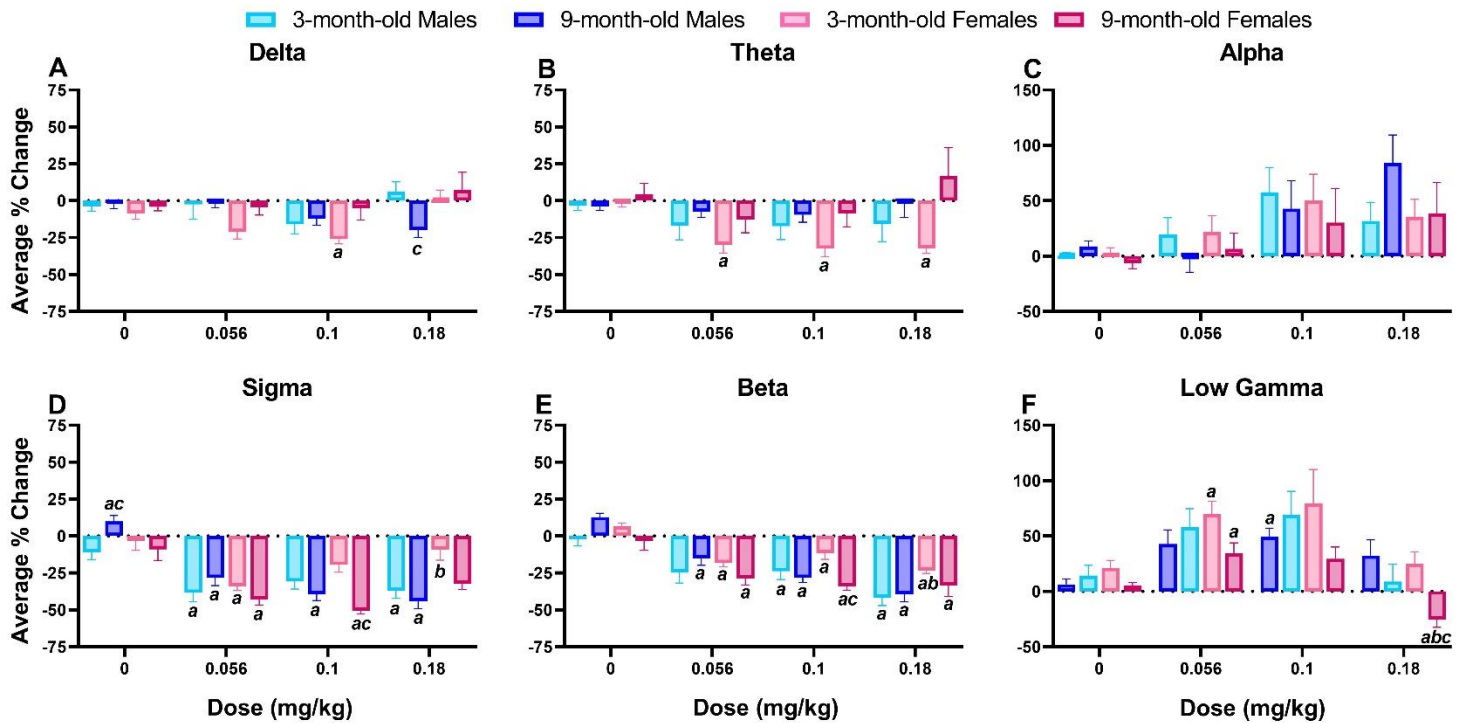

**Figure S6. MK-801-induced differences in relative power.** For direct group comparisons in response to MK-801, each individual's percent change from baseline in the 30-90 min post-dosing period was averaged and graphed as a group mean  $\pm$ SEM to assess the effects of MK-801 administration on delta (A), theta (B), alpha (C), sigma (D), beta (E), and low gamma power (F). A three-way ANOVA was run for each graph. For delta, there was a main effect of dose ( $F_{2,522, 68.95} = 3.962$ ,  $p < 0.05$ ) and an dose x age interaction ( $F_{3, 82} = 2.89$ ,  $p < 0.05$ ) (A). For theta, there was main effect of dose ( $F_{1, 979, 54.10} = 5.516$ ,  $p < 0.05$ ) and age ( $F_{1, 28} = 4.501$ ,  $p < 0.05$ ) and a dose x age interaction ( $F_{3, 82} = 3.391$ ,  $p < 0.05$ ) (B). For alpha, there was a main effect of dose ( $F_{2, 351, 64.27} = 9.345$ ,  $p = 0.0001$ ) (C). For sigma, there was a main effect of dose ( $F_{2, 576, 70.41} = 40.89$ ,  $p < 0.0001$ ) and age ( $F_{1, 28} = 4.599$ ,  $p < 0.05$ ) and a significant dose x sex ( $F_{3, 82} = 6.284$ ,  $p < 0.001$ ), dose x age ( $F_{3, 82} = 7.179$ ,  $p < 0.001$ ), and age x sex ( $F_{1, 28} = 11.12$ ,  $p < 0.005$ ) interaction (D). For beta, there was a main effect of dose ( $F_{2, 716, 74.23} = 46.82$ ,  $p < 0.0001$ ) and a significant age x sex interaction ( $F_{1, 28} = 8.608$ ,  $p < 0.05$ ) (E). Lastly, for low gamma there was a main effect of dose ( $F_{2, 761, 75.47} = 19.55$ ,  $p < 0.0001$ ) and age ( $F_{1, 28} = 5.256$ ,  $p < 0.05$ ) but no interactions (F).  $p < 0.05$ , *a*, compared to group's respective vehicle condition, *b*, compared to male rats of the same age and *c*, compared to 3-month-old rats of the same sex.

**Supplementary Table S1.** Average weights of rats in each group on first dose day

|                | 3-month-old Males | 9-month-old Males | 3-month-old Females | 9-month-old Females |
|----------------|-------------------|-------------------|---------------------|---------------------|
| Average Weight | 325.8             | 776.9             | 224.8               | 288.9               |
| Std. Deviation | 9.4               | 168.3             | 8.7                 | 10.9                |



**Supplementary Table S2.** Statistics for supplementary figures S1 and S2

| Timecourse Statistics (Males)                 |                     |             |       |         |      |                                               |                                                                                     |
|-----------------------------------------------|---------------------|-------------|-------|---------|------|-----------------------------------------------|-------------------------------------------------------------------------------------|
| Figure                                        | Source of Variation | DF          | F     | p       | *    | Post hoc results                              | Significant Timepoints (10-minute bin)                                              |
| 3-month-old Males                             |                     |             |       |         |      |                                               |                                                                                     |
| S1A<br>Delta                                  | Dose                | 3.13, 25.01 | 2.383 | 0.0912  | ns   | Vehicle vs 0.056 mg/kg                        | 290                                                                                 |
|                                               | Time                | 3.31, 26.45 | 4.628 | 0.0083  | **   | Vehicle vs 0.1 mg/kg                          | 90, 240, 290                                                                        |
|                                               | Interaction         | 4.67, 36.04 | 3.794 | 0.0083  | **   | Vehicle vs 0.18 mg/kg<br>Vehicle vs 0.3 mg/kg | 0, 90, 110-140, 160, 290, 300<br>-50, 20, 30, 160, 290, 300                         |
| S1B<br>Theta                                  | Dose                | 1.98, 15.80 | 10.48 | 0.0013  | **   | Vehicle vs 0.056 mg/kg                        | 90, 100, 120, 130                                                                   |
|                                               | Time                | 1.71, 13.70 | 4.033 | 0.0471  | *    | Vehicle vs 0.1 mg/kg<br>Vehicle vs 0.18 mg/kg | 70, 80, 120, 130, 150-180<br>80, 130, 150-170, 190-230                              |
|                                               | Interaction         | 4.62, 35.42 | 1.631 | 0.1813  | ns   | Vehicle vs 0.3 mg/kg                          | -120, 70, 80, 130, 160-230, 250                                                     |
| S1C<br>Alpha                                  | Dose                | 2.84, 22.68 | 0.668 | 0.572   | ns   | Vehicle vs 0.056 mg/kg                        | -40, 130, 290, 300                                                                  |
|                                               | Time                | 2.14, 17.08 | 3.603 | 0.047   | *    | Vehicle vs 0.1 mg/kg<br>Vehicle vs 0.18 mg/kg | 170, 180, 210-230, 250, 260<br>220, 240, 260, 270, 280-300                          |
|                                               | Interaction         | 3.84, 29.54 | 4.296 | 0.008   | **   | Vehicle vs 0.3 mg/kg                          | -80, 150, 250, 260, 290, 300                                                        |
| S1D<br>Sigma                                  | Dose                | 3.06, 24.48 | 18.73 | <0.0001 | **** | Vehicle vs 0.056 mg/kg                        | 60-110, 130, 150, 170-200                                                           |
|                                               | Time                | 3.74, 29.91 | 16.88 | <0.0001 | **** | Vehicle vs 0.1 mg/kg<br>Vehicle vs 0.18 mg/kg | -10, 70-150, 170, 180, 200, 210, 230, 240, 260<br>40, 70-100, 130-150, 170-280, 300 |
|                                               | Interaction         | 5.27, 40.49 | 3.10  | 0.017   | *    | Vehicle vs 0.3 mg/kg                          | -100, 70-300                                                                        |
| S1E<br>Beta                                   | Dose                | 2.85, 22.82 | 16.11 | <0.0001 | **** | Vehicle vs 0.056 mg/kg                        | 60, 70, 90, 130, 190, 200                                                           |
|                                               | Time                | 3.86, 30.84 | 11.86 | <0.0001 | **** | Vehicle vs 0.1 mg/kg<br>Vehicle vs 0.18 mg/kg | 30, 70, 90, 100, 130, 180-220, 240<br>10-100, 250, 270-300                          |
|                                               | Interaction         | 4.76, 36.63 | 2.90  | 0.0282  | *    | Vehicle vs 0.3 mg/kg                          | -100, 10-100, 130-160, 180-210, 240, 250, 270-300                                   |
| S1F<br>Low Gamma                              | Dose                | 2.63, 21.03 | 7.941 | 0.0014  | **   | Vehicle vs 0.056 mg/kg                        | 90-120, 160, 300                                                                    |
|                                               | Time                | 3.83, 30.67 | 7.851 | 0.0002  | ***  | Vehicle vs 0.1 mg/kg<br>Vehicle vs 0.18 mg/kg | 50, 70-180<br>20, 100-190, 220, 280                                                 |
|                                               | Interaction         | 4.98, 38.33 | 4.705 | 0.0019  | **   | Vehicle vs 0.3 mg/kg                          | 10, 20, 160-260                                                                     |
| 9-month-old Males                             |                     |             |       |         |      |                                               |                                                                                     |
| S2A<br>Delta                                  | Dose                | 1.96, 13.68 | 1.030 | 0.3813  | ns   | Vehicle vs 0.056 mg/kg                        | 240                                                                                 |
|                                               | Time                | 3.76, 26.29 | 3.819 | 0.0156  | *    | Vehicle vs 0.1 mg/kg<br>Vehicle vs 0.18 mg/kg | 10, 20, 220, 240<br>60, 90, 250-290                                                 |
|                                               | Interaction         | 5.38, 32.79 | 3.223 | 0.0159  | *    | Vehicle vs 0.3 mg/kg                          | -120                                                                                |
| S2B<br>Theta                                  | Dose                | 2.15, 15.01 | 2.218 | 0.1409  | ns   |                                               |                                                                                     |
|                                               | Time                | 2.83, 19.83 | 3.910 | 0.0257  | *    |                                               |                                                                                     |
|                                               | Interaction         | 4.63, 28.25 | 1.537 | 0.2133  | ns   |                                               |                                                                                     |
| S2C<br>Alpha                                  | Dose                | 1.56, 10.91 | 2.131 | 0.17    | ns   | Vehicle vs 0.056 mg/kg                        | 190, 260                                                                            |
|                                               | Time                | 2.11, 14.81 | 3.279 | 0.0641  | ns   | Vehicle vs 0.1 mg/kg                          | -80, -10, 230, 240, 280, 290                                                        |
|                                               | Interaction         | 3.30, 20.14 | 3.352 | 0.0359  | *    |                                               |                                                                                     |
| S2D<br>Sigma                                  | Dose                | 2.48, 17.34 | 45.27 | <0.0001 | **** | Vehicle vs 0.056 mg/kg                        | 10, 20, 50, 80, 90, 190, 250                                                        |
|                                               | Time                | 4.16, 29.12 | 18.83 | <0.0001 | **** | Vehicle vs 0.1 mg/kg<br>Vehicle vs 0.18 mg/kg | 10-180, 200, 220-290<br>10-300                                                      |
|                                               | Interaction         | 4.55, 27.73 | 6.013 | 0.0009  | ***  | Vehicle vs 0.3 mg/kg                          | 10, 50-300                                                                          |
| S2E<br>Beta                                   | Dose                | 2.51, 17.54 | 44.04 | <0.0001 | **** | Vehicle vs 0.056 mg/kg                        | 0, 20, 40, 50, 80, 90, 120, 240, 290                                                |
|                                               | Time                | 4.10, 28.68 | 13.15 | <0.0001 | **** | Vehicle vs 0.1 mg/kg<br>Vehicle vs 0.18 mg/kg | 10-170, 200-300<br>10-300                                                           |
|                                               | Interaction         | 5.09, 31.03 | 7.211 | 0.0001  | ***  | Vehicle vs 0.3 mg/kg                          | 0-300                                                                               |
| S2F<br>Low Gamma                              | Dose                | 2.65, 18.52 | 2.495 | 0.0975  | ns   |                                               |                                                                                     |
|                                               | Time                | 3.12, 21.82 | 9.171 | 0.0004  | ***  |                                               |                                                                                     |
|                                               | Interaction         | 4.19, 25.56 | 2.293 | 0.0845  | ns   |                                               |                                                                                     |
| *p<0.05; ** p<0.01; *** p<0.001; ****p<0.0001 |                     |             |       |         |      |                                               |                                                                                     |



**Supplementary Table S3.** Statistics for supplementary figures S3 and S4

| Timecourse Statistics (Females)               |                     |             |       |         |      |                        |                                                         |
|-----------------------------------------------|---------------------|-------------|-------|---------|------|------------------------|---------------------------------------------------------|
| Figure                                        | Source of Variation | DF          | F     | p       | *    | Post hoc results       | Significant Timepoints (10-minute bin)                  |
| 3-month-old Females                           |                     |             |       |         |      |                        |                                                         |
| S3A<br>Delta                                  | Dose                | 1.74, 8.70  | 6.239 | 0.0729  | ns   |                        |                                                         |
|                                               | Time                | 4.04, 20.17 | 3.699 | 0.0019  | **   |                        |                                                         |
|                                               | Interaction         | 3.97, 19.52 | 2.737 | 0.0587  | ns   |                        |                                                         |
| S3B<br>Theta                                  | Dose                | 2.42, 12.08 | 44.16 | <0.0001 | **** | Vehicle vs 0.03 mg/kg  | 40, 50, 80, 110, 140, 150                               |
|                                               | Time                | 2.85, 14.24 | 16.01 | <0.0001 | **** | Vehicle vs 0.056 mg/kg | 40, 50, 70-90, 110-190, 210, 220, 270                   |
|                                               |                     |             |       |         |      | Vehicle vs 0.1 mg/kg   | 10-50, 70-300                                           |
|                                               | Interaction         | 3.41, 16.73 | 5.804 | 0.0053  | **   | Vehicle vs 0.18 mg/kg  | 10-50, 70-300                                           |
|                                               | Dose                | 2.19, 10.94 | 3.306 | 0.0722  | ns   |                        |                                                         |
|                                               | Time                | 2.23, 11.16 | 5.002 | 0.0256  | *    |                        |                                                         |
| Interaction                                   | 3.62, 17.77         | 2.972       | 0.052 | ns      |      |                        |                                                         |
| S3D<br>Sigma                                  | Dose                | 1.75, 8.77  | 5.218 | 0.0351  | *    | Vehicle vs 0.03 mg/kg  | -40, 50, 80                                             |
|                                               | Time                | 2.75, 13.74 | 5.864 | 0.0096  | **   | Vehicle vs 0.056 mg/kg | 30, 50-70, 90-150, 170, 230, 300                        |
|                                               |                     |             |       |         |      | Vehicle vs 0.1 mg/kg   | 10-50, 70-300                                           |
|                                               | Interaction         | 3.93, 19.27 | 2.586 | 0.0704  | ns   | Vehicle vs 0.18 mg/kg  | 10-50, 70-300                                           |
|                                               | Dose                | 2.63, 13.12 | 12.26 | 0.0006  | ***  | Vehicle vs 0.03 mg/kg  | 190, 280                                                |
|                                               | Time                | 2.60, 13.01 | 4.067 | 0.0344  | *    | Vehicle vs 0.056 mg/kg | 20, 30, 50, 70, 110,120,150-170,190, 210, 230, 250, 280 |
|                                               |                     |             |       |         |      | Vehicle vs 0.1 mg/kg   | 30, 70, 160, 190, 210                                   |
|                                               | Interaction         | 3.48, 17.09 | 1.984 | 0.1484  | ns   | Vehicle vs 0.18 mg/kg  | 20-70, 90, 110, 120, 140, 150, 190-230                  |
|                                               | Dose                | 1.12, 5.59  | 5.375 | 0.0607  | ns   | Vehicle vs 0.03 mg/kg  | 50, 80, 100-130                                         |
| S3F<br>Low Gamma                              | Time                | 2.77, 13.87 | 12.86 | 0.0003  | ***  | Vehicle vs 0.056 mg/kg | 80-120, 150, 160, 190, 220                              |
|                                               |                     |             |       |         |      | Vehicle vs 0.1 mg/kg   | -40, 150, 160, 220, 230, 250-280, 300                   |
|                                               | Interaction         | 3.87, 18.99 | 3.984 | 0.0171  | *    | Vehicle vs 0.18 mg/kg  | 260, 270, 290, 300                                      |
| 9-month-old Females                           |                     |             |       |         |      |                        |                                                         |
| S4A<br>Delta                                  | Dose                | 2.33, 18.67 | 0.258 | 0.8072  | ns   |                        |                                                         |
|                                               | Time                | 2.46, 19.70 | 2.094 | 0.142   | ns   |                        |                                                         |
|                                               | Interaction         | 5.04, 34.76 | 1.188 | 0.3351  | ns   |                        |                                                         |
| S4B<br>Theta                                  | Dose                | 1.48, 11.84 | 2.613 | 0.1241  | ns   |                        |                                                         |
|                                               | Time                | 1.37, 10.94 | 1.032 | 0.3586  | ns   |                        |                                                         |
|                                               | Interaction         | 2.05, 14.16 | 2.069 | 0.1621  | ns   |                        |                                                         |
| S4C<br>Alpha                                  | Dose                | 2.43, 19.42 | 2.420 | 0.1069  | ns   |                        |                                                         |
|                                               | Time                | 2.07, 16.57 | 1.615 | 0.2286  | ns   |                        |                                                         |
|                                               | Interaction         | 3.95, 27.22 | 2.053 | 0.1156  | ns   |                        |                                                         |
| S4D<br>Sigma                                  | Dose                | 1.74, 13.90 | 18.56 | 0.0002  | ***  | Vehicle vs 0.03 mg/kg  | 30, 100, 110, 130, 140, 300                             |
|                                               | Time                | 3.72, 29.78 | 18.35 | <0.0001 | **** | Vehicle vs 0.056 mg/kg | 20-60, 80-240, 280-300                                  |
|                                               |                     |             |       |         |      | Vehicle vs 0.1 mg/kg   | 20-300                                                  |
|                                               | Interaction         | 4.82, 33.23 | 3.767 | 0.0088  | **   | Vehicle vs 0.18 mg/kg  | 20, 30, 110-130, 150-190, 210-300                       |
|                                               | Dose                | 2.35, 18.77 | 15.69 | <0.0001 | **** | Vehicle vs 0.03 mg/kg  | 30, 110, 120                                            |
|                                               | Time                | 3.42, 27.33 | 10.68 | <0.0001 | **** | Vehicle vs 0.056 mg/kg | 20, 40-60, 100-190, 210-230, 260, 280-300               |
|                                               |                     |             |       |         |      | Vehicle vs 0.1 mg/kg   | 20-60, 80, 100-300                                      |
|                                               | Interaction         | 4.46, 30.77 | 3.335 | 0.019   | *    | Vehicle vs 0.18 mg/kg  | 20, 50, 60, 110-300                                     |
|                                               | Dose                | 2.28, 18.22 | 13.05 | 0.0002  | ***  | Vehicle vs 0.03 mg/kg  | 100, 220, 230                                           |
| S4F<br>Low Gamma                              | Time                | 2.97, 23.73 | 3.201 | 0.042   | *    | Vehicle vs 0.056 mg/kg | -60, 30, 150, 160, 200-250, 300                         |
|                                               |                     |             |       |         |      | Vehicle vs 0.1 mg/kg   | 30, 200-250, 270, 300                                   |
|                                               | Interaction         | 5.19, 35.81 | 3.347 | 0.013   | *    | Vehicle vs 0.18 mg/kg  | 20, 40, 50, 70                                          |
| *p<0.05; ** p<0.01; *** p<0.001; ****p<0.0001 |                     |             |       |         |      |                        |                                                         |
